# Supplementary material for: Recurrent neural networks for time domain modelling of FTIR spectra: application to brain tumour detection
Source: Royal Society of Chemistry journal article supplement (doi:10.1039/d2an02041f), 2023-01-01

## Recurrent Neural Networks for Time Domain Modelling of Vibrational Spectra: Application to Brain Tumour Detection

**Authors:** Georgios Antoniou, Justin J.A. Conn, Benjamin R. Smith, Paul M. Brennan, Matthew J. Baker, David S. Palmer

### Supplementary Information

**Table S1.** Age (deciles) and sex information about cohort A (size 1438). The corresponding dataset was used as a training set for all models. Where data was unavailable or not recorded, 'NA' (Not available) was noted. Where no samples correspond to a combination of age or sex values, '-' was noted

|       |     | Cancer (M/F) | Non-cancer (M/F/NA) |
|-------|-----|--------------|---------------------|
| Age   | 10+ | 3/2          | 1/0                 |
|       | 20+ | 21/18        | 62/38               |
|       | 30+ | 43/47        | 105/30              |
|       | 40+ | 65/56        | 41/16               |
|       | 50+ | 118/149      | 79/27               |
|       | 60+ | 155/114      | 31/3                |
|       | 70+ | 99/79        | -                   |
|       | 80+ | 13/17        | -                   |
|       | 90+ | 1/0          | -                   |
|       | NA  | -            | 1/3/1               |
| Total |     | 1000         | 438                 |

**Table S2.** Age and sex information about cohort B (385). The corresponding dataset was used as an external test set for the final model. Where no samples correspond to a combination of age or sex values, '-' was noted

|       |     | Cancer (M/F) | Non-cancer (M/F) |
|-------|-----|--------------|------------------|
| Age   | 20+ | -            | 5/14             |
|       | 30+ | 2/3          | 16/20            |
|       | 40+ | 4/5          | 12/18            |
|       | 50+ | 2/6          | 23/28            |
|       | 60+ | 12/9         | 20/44            |
|       | 70+ | 9/5          | 34/36            |
|       | 80+ | 4/5          | 23/21            |
|       | 90+ | 0/1          | 3/1              |
| Total |     | 67           | 318              |

**Table S3.** Patient cohort A breakdown with tumour classification details

|                | Tumour type                   | Total |
|----------------|-------------------------------|-------|
| <b>Tumour</b>  |                               |       |
|                | Metastatic                    | 315   |
|                | Glioblastoma                  | 265   |
|                | Meningioma                    | 137   |
|                | Astrocytoma                   | 81    |
|                | Pituitary adenoma             | 78    |
|                | Schwannoma                    | 46    |
|                | Oligodendroglioma             | 31    |
|                | Ependymoma                    | 8     |
|                | Glioma                        | 8     |
|                | Haemangioblastoma             | 6     |
|                | Haemangiopericytoma           | 6     |
|                | Lymphoma                      | 4     |
|                | Subependymoma                 | 3     |
|                | Neurocytoma                   | 2     |
|                | Embryonal tumour              | 1     |
|                | Ganglioglioma                 | 1     |
|                | Germinoma                     | 1     |
|                | Medulloblastoma               | 1     |
|                | Neurofibroma                  | 1     |
|                | Orbital tumour                | 1     |
|                | PPTID                         | 1     |
|                | Papillary tumour              | 1     |
|                | Pineocytoma                   | 1     |
|                | Malignant spindle cell tumour | 1     |
| <b>Control</b> |                               | 438   |
|                | <b>Total</b>                  | 1438  |

\*PPTID – *Pineal parenchymal tumour of intermediate differentiation*

**Table S4.** Patient cohort B breakdown with tumour classification details

|                | Tumour type       | Total |
|----------------|-------------------|-------|
| <b>Tumour</b>  |                   |       |
|                | Glioblastoma      | 35    |
|                | Metastatic        | 16    |
|                | Meningioma        | 5     |
|                | Astrocytoma       | 3     |
|                | Oligodendroglioma | 3     |
|                | Ependymoma        | 1     |
|                | Pituitary adenoma | 1     |
|                | Schwannoma        | 1     |
|                | Subependymoma     | 1     |
|                | Medulloblastoma   | 1     |
| <b>Control</b> |                   | 318   |
|                | <b>Total</b>      | 385   |

**Table S5.** Distributions of patients against number of spectra measured in each dataset

| Dataset  | Number of spectra | Percentage of patients (%) |
|----------|-------------------|----------------------------|
| <b>A</b> | 2                 | 0.07                       |
|          | 3                 | 1.88                       |
|          | 4                 | 0.07                       |
|          | 5                 | 0.42                       |
|          | 6                 | 5.35                       |
|          | 7                 | 0.83                       |
|          | 8                 | 2.85                       |
|          | 9                 | 88.53                      |
| <b>B</b> | 9                 | 100                        |

**Table S6.** Additional patient metadata for Cohort B including symptomatology. Where data was unavailable or not recorded, 'NA' (Not available) was noted. BMI, body mass index; NSAID, non-steroidal anti-inflammatory drugs

| <b>Metadata</b>           |             | <b>Cancer</b> | <b>Non-cancer</b> |
|---------------------------|-------------|---------------|-------------------|
| <b>Symptomatology</b>     |             |               |                   |
| Headache                  | Yes         | 34            | 102               |
|                           | No          | 32            | 209               |
|                           | NA          | 3             | 5                 |
| Headache duration         | < 1month    | 10            | 49                |
|                           | <6 months   | 14            | 31                |
|                           | > 6 months  | 8             | 115               |
|                           | NA          | 37            | 121               |
| Headache worse in morning | Yes         | 9             | 61                |
|                           | No          | 18            | 146               |
|                           | NA          | 42            | 109               |
| Headache with nausea      | Yes         | 9             | 76                |
|                           | No          | 17            | 133               |
|                           | NA          | 43            | 107               |
| Memory change             | Yes         | 13            | 124               |
|                           | No          | 47            | 185               |
|                           | NA          | 9             | 7                 |
| Personality change        | Yes         | 11            | 80                |
|                           | No          | 50            | 230               |
|                           | NA          | 8             | 6                 |
| Verbal fluency            | 15+         | 26            | 47                |
|                           | <15         | 16            | 91                |
|                           | NA          | 27            | 178               |
| <b>Drugs</b>              |             |               |                   |
| Steroids                  | Yes         | 35            | 50                |
|                           | No          | 4             | 105               |
|                           | NA          | 30            | 161               |
| Anti-epileptic drugs      | Yes         | 20            | 17                |
|                           | No          | 49            | 299               |
| Statins                   | Yes         | 17            | 60                |
|                           | No          | 52            | 256               |
| Anti-hypertensives        | Yes         | 18            | 93                |
|                           | No          | 51            | 223               |
| Anti-thrombotics          | Yes         | 8             | 45                |
|                           | No          | 61            | 271               |
| NSAIDs                    | Yes         | 6             | 53                |
|                           | No          | 63            | 263               |
| <b>BMI</b>                |             |               |                   |
|                           | Underweight | 5             | 37                |
|                           | Normal      | 37            | 145               |
|                           | Overweight  | 18            | 91                |
|                           | Obese       | 6             | 21                |
|                           | NA          | 3             | 22                |

**Fig S1.** Diagrammatic representation of data representations and corresponding transformations. *IDFT* denotes Inverse Discrete Fourier Transform,  $P_{EMSC}$  denotes two sequential pre-processing steps applied to the raw frequency domain spectra, namely cut to the wavenumber region  $3500 - 1000\text{cm}^{-1}$  and EMSC transformation (up to degree 2 corrections).

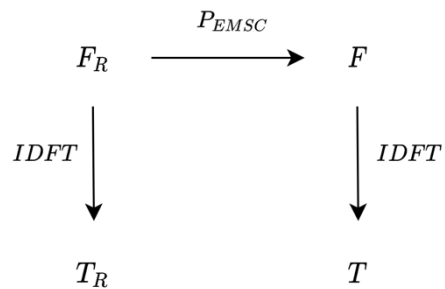

Supplement: d2an02041f1.pdf [file d2an02041f1.pdf]
